# Supplementary material for: Alterations in Corneal Sensory Nerves During Homeostasis, Aging, and After Injury in Mice Lacking the Heparan Sulfate Proteoglycan Syndecan-1
Source: PubMed Central journal article supplement (PMC5627677; doi:10.1167/iovs.17-21531), 2017-10
Supplement: iovs-58-11-20_s01.pdf [file iovs-58-11-20_s01.pdf]

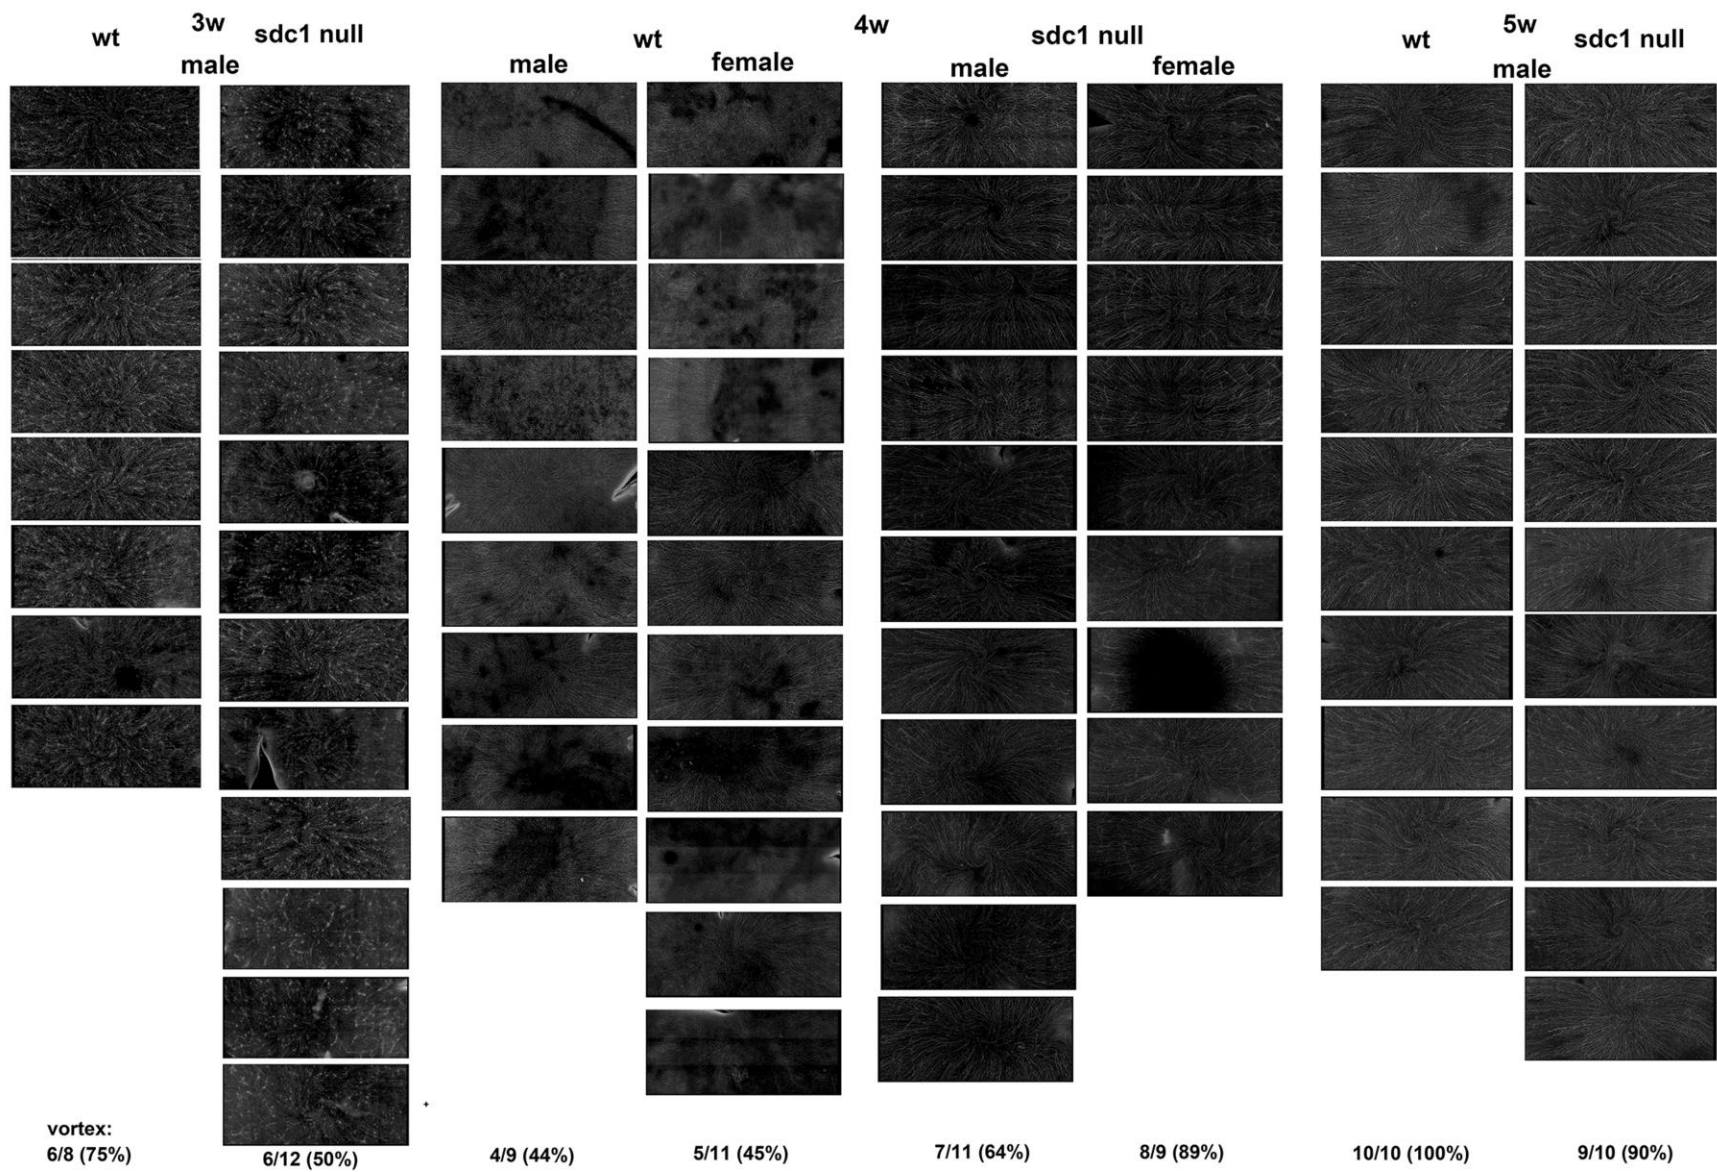

Supp. 1 3w-5w post natal dev

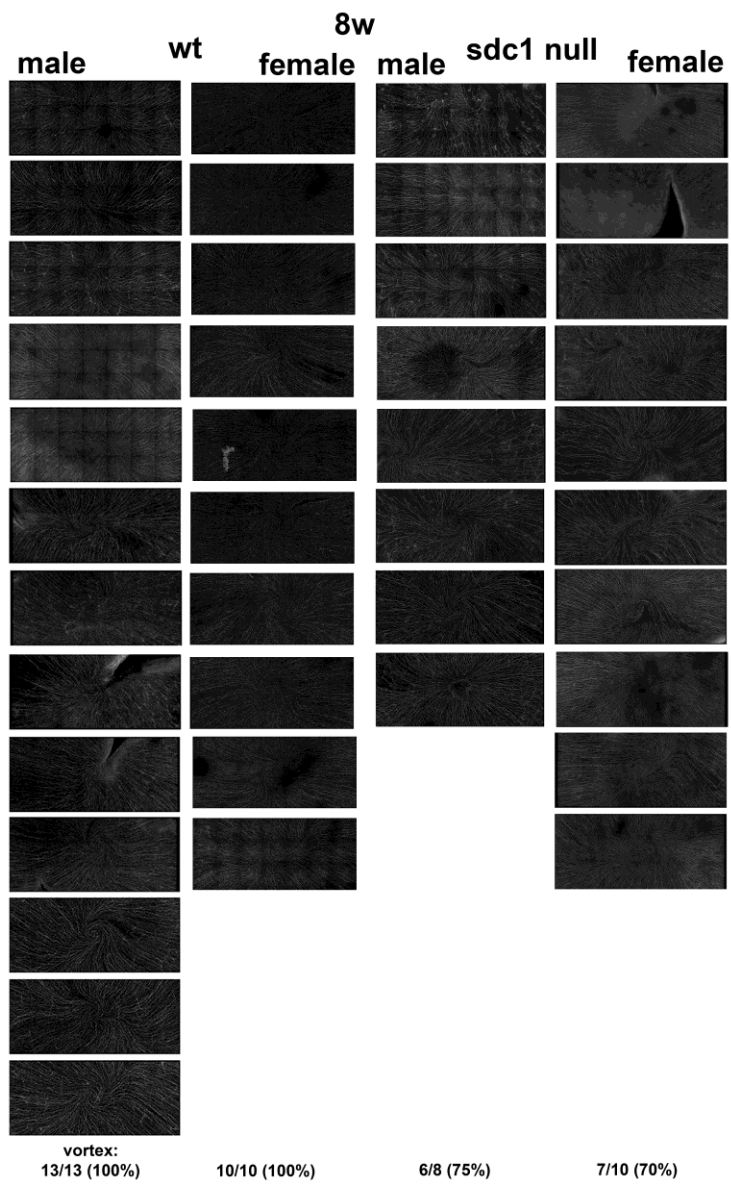

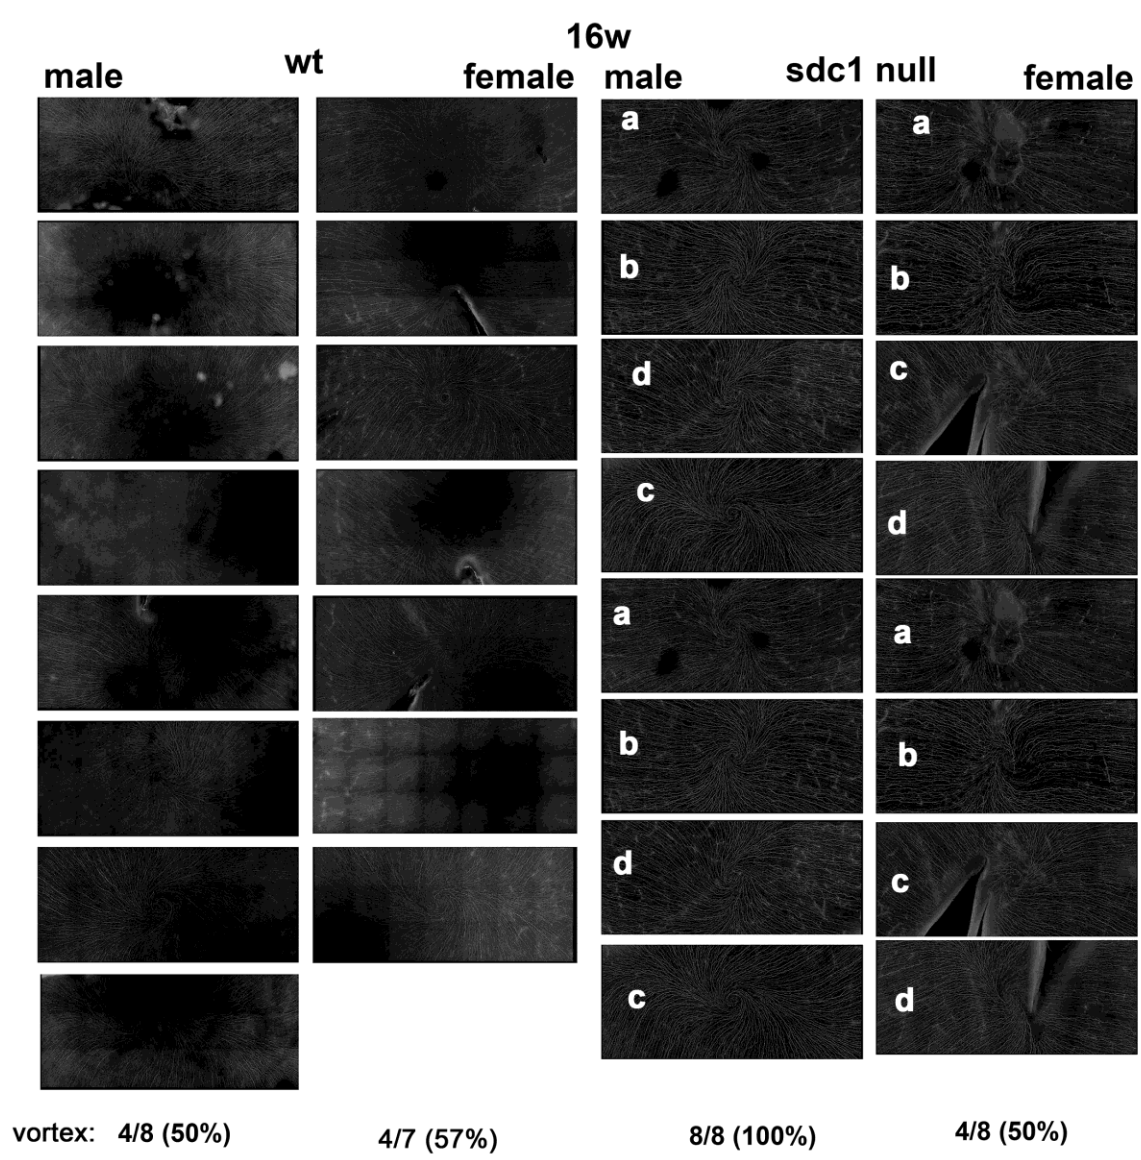

Supp. 3 16w unwounded

**wt**      **40w female**      **sdcd1 null**

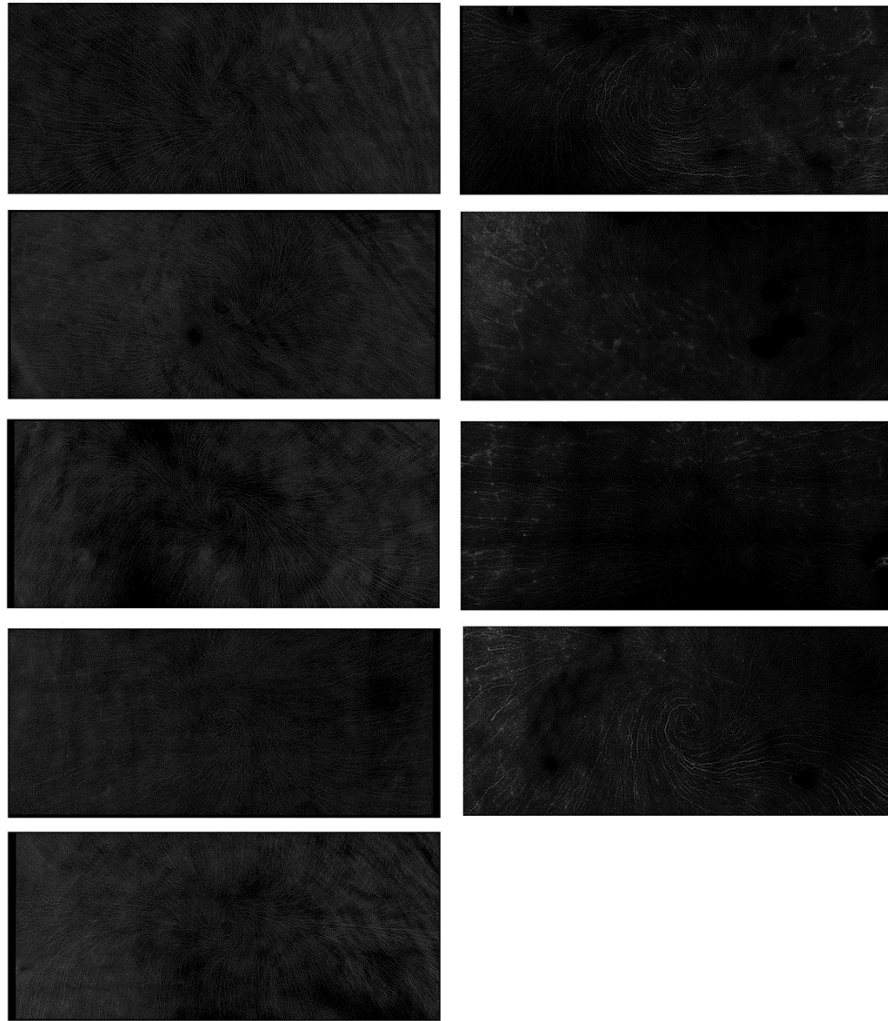

**5/5 (100%)**

**2/4 (50%)**

Supp. 4. 40w post natal dev

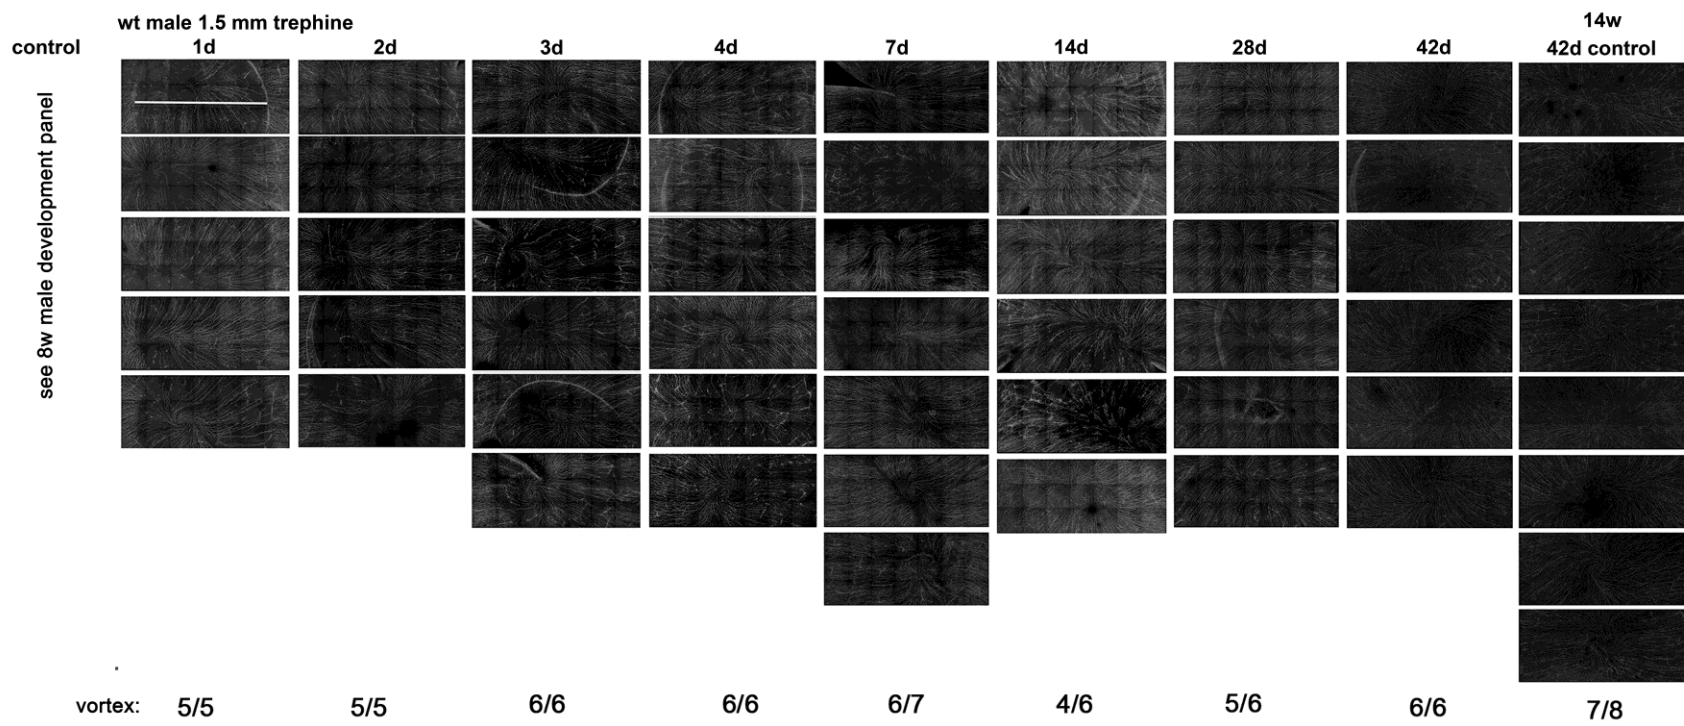

Supp. 5 wt male tre

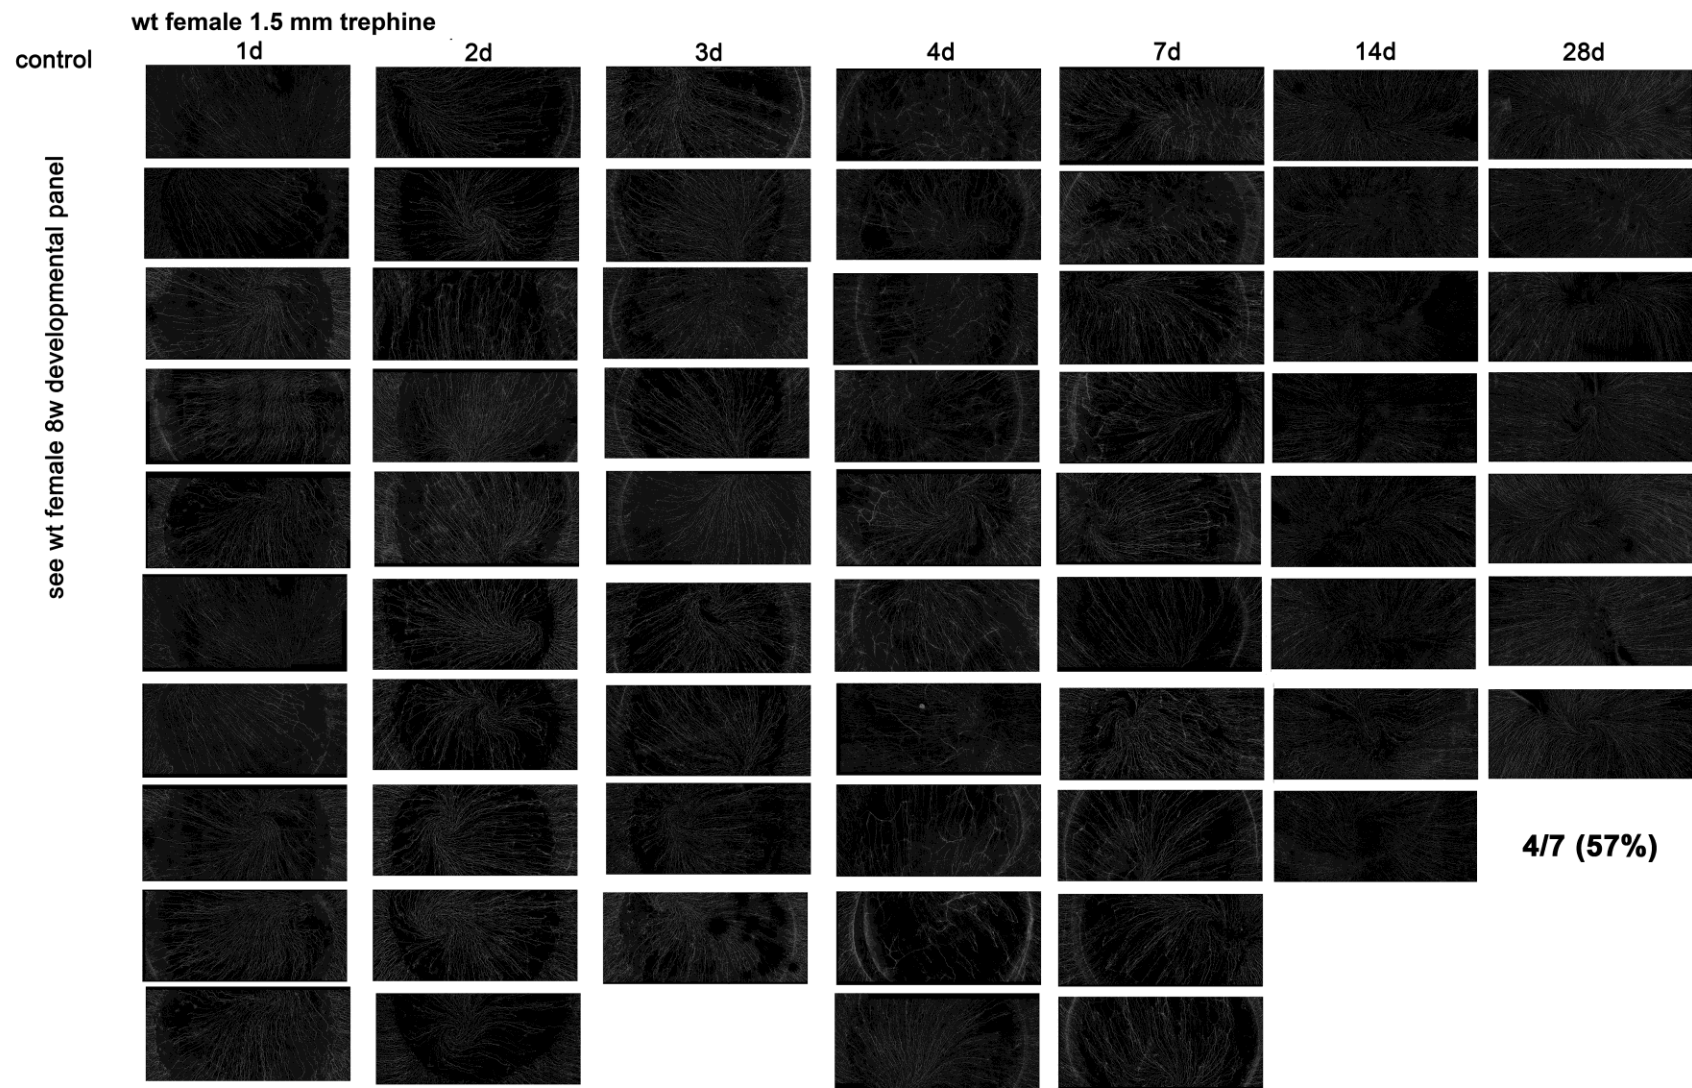

Supp. 6 wt female tre

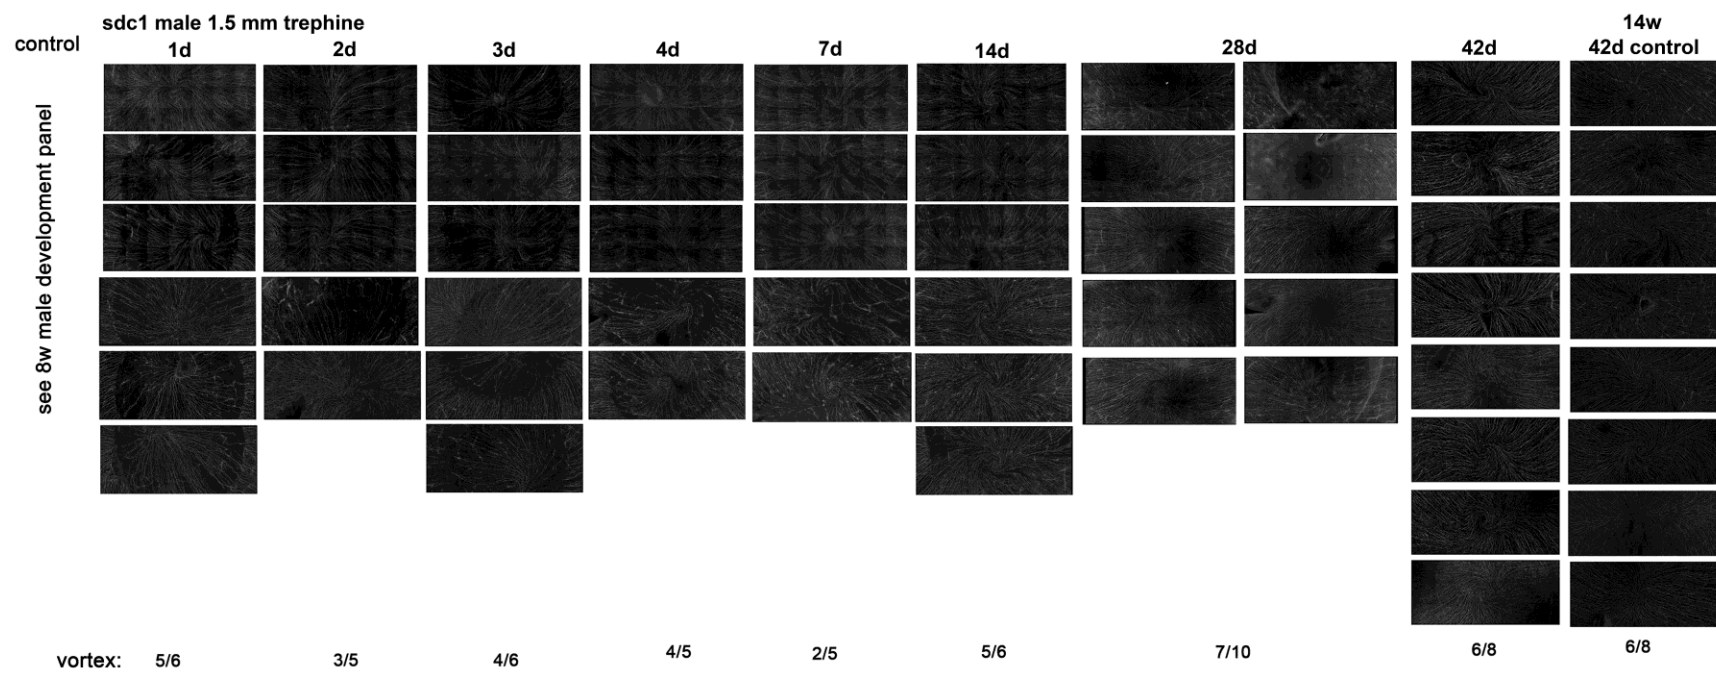

Supp. 7 sdc1 null tre







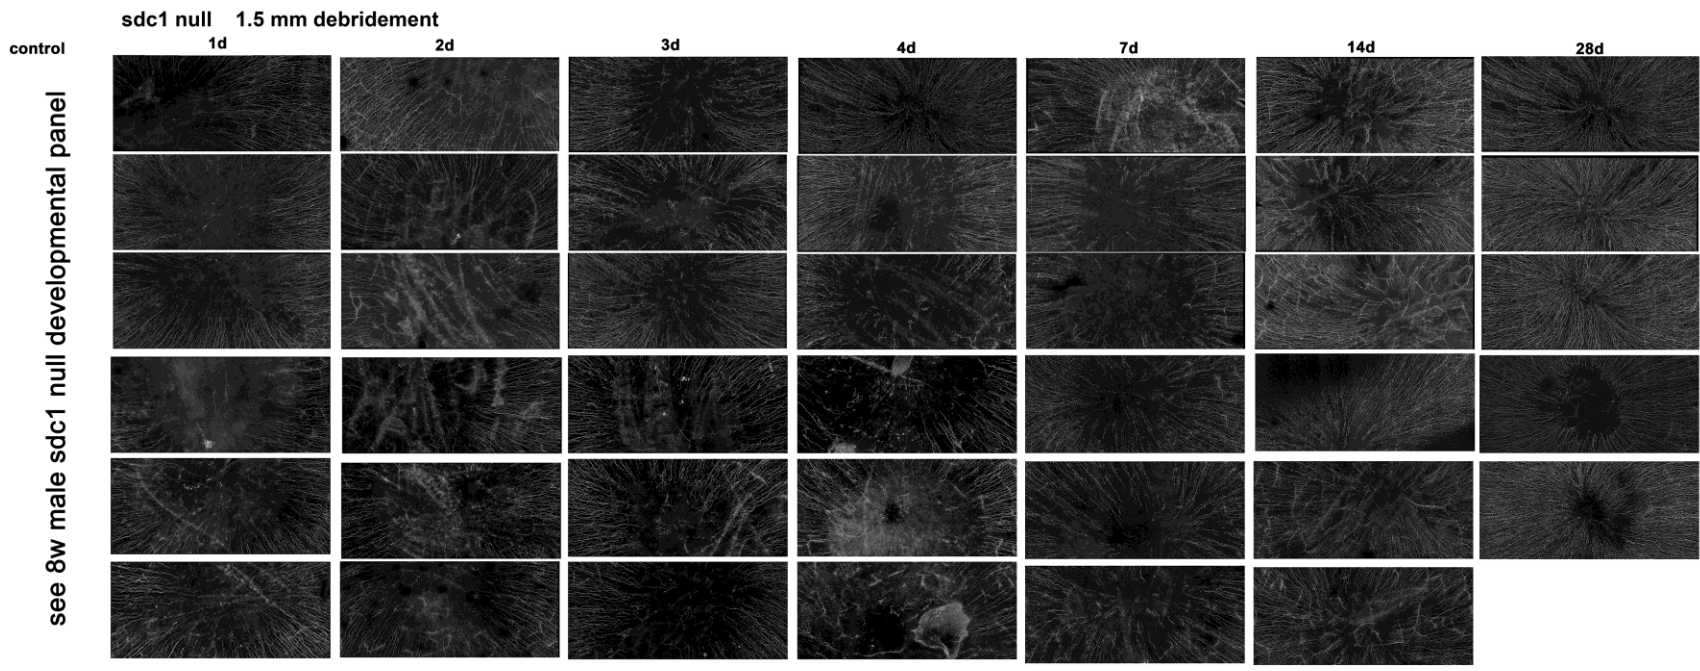

Supp. 9. sdc1 null sm
